# Supplementary material for: GP73-regulated oncolytic adenoviruses possess potent killing effect on human liver cancer stem-like cells
Source: PubMed Central journal article supplement (PMC5045400; doi:10.18632/oncotarget.8830), 2016-04-18
Supplement: oncotarget-07-29346-s001.pdf [file oncotarget-07-29346-s001.pdf]

## GP73-regulated oncolytic adenoviruses possess potent killing effect on human liver cancer stem-like cells

### Supplementary Materials

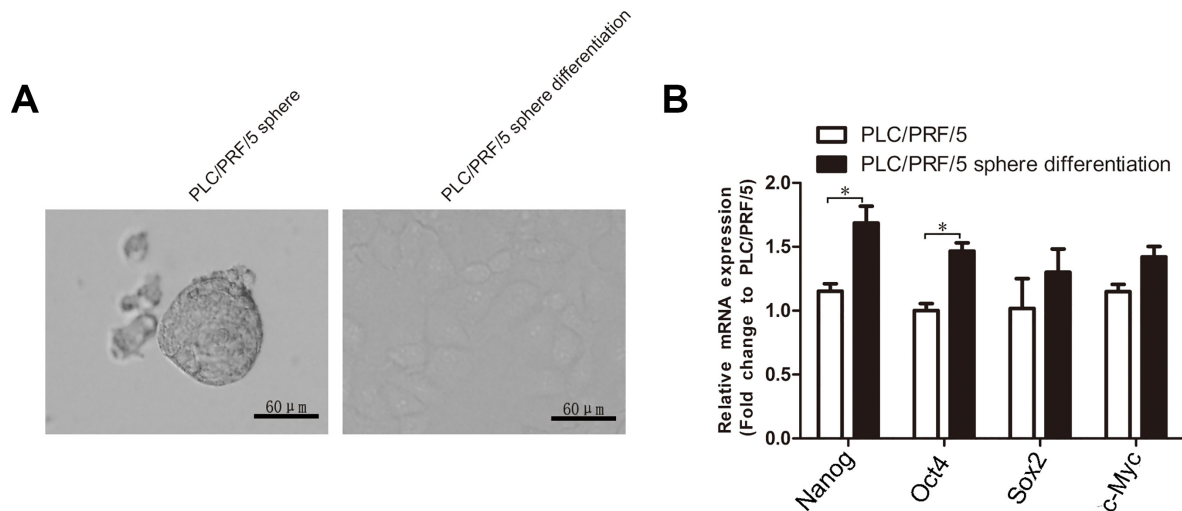

**Supplementary Figure S1: The attributes of differentiation for PLC/PRF/5 sphere cells.** (A) PLC/PRF/5 sphere cells differentiated to their parental counterparts through culturing adherently in 10% FBS medium by 7 days. scale bar: 200  $\mu$ m. (B) PLC/PRF/5 sphere cells differentiated by 4 days in 5% FBS medium adherently still elevated liver CSCs-associated genes. All experiments were repeated three times and all data shown represented mean  $\pm$  SD ( $n = 3$ ). \* $P < 0.05$ , \*\* $P < 0.01$ , \*\*\* $P < 0.001$ .

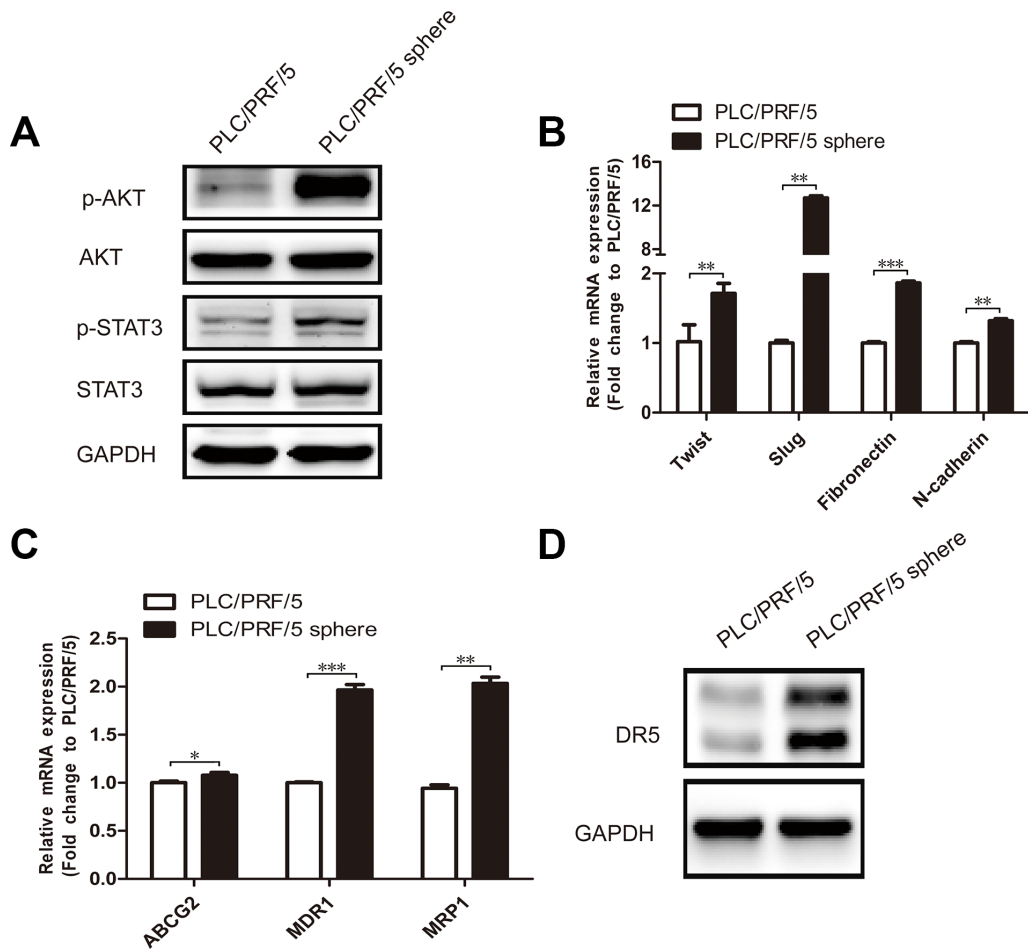

**Supplementary Figure S2: PLC/PRF/5 sphere cells upregulated the related genes and proteins associated with CSCs.**

(A) Western blot indicated that sphere cells activated PI3K/AKT signaling pathway and increased phosphorylation levels of STAT3 than parental cells in PLC/PRF/5. (B) PLC/PRF/5 sphere cells overexpressed the epithelial-mesenchymal transition-inducing markers (e.g., Fibronectin and N-Cadherin) and transcription factors (e.g., Twist and Slug) when compared to PLC/PRF/5 cells. qRT-PCR data were normalized to GAPDH gene and shown as fold change relative to PLC/PRF/5 cells. (C) Upregulation of the related mRNAs of drug-resistance (e.g., ABCG2, MDR1, MRP1) in PLC/PRF/5 sphere cells. qRT-PCR data were normalized to GAPDH gene and are shown as fold change relative to PLC/PRF/5 cells. (D) DR5 (dopamine receptors 5) protein level increased in PLC/PRF/5 sphere cells. All experiments were repeated three times and all data shown represented mean  $\pm$  SD ( $n = 3$ ). \* $P < 0.05$ , \*\* $P < 0.01$ , \*\*\* $P < 0.001$ .

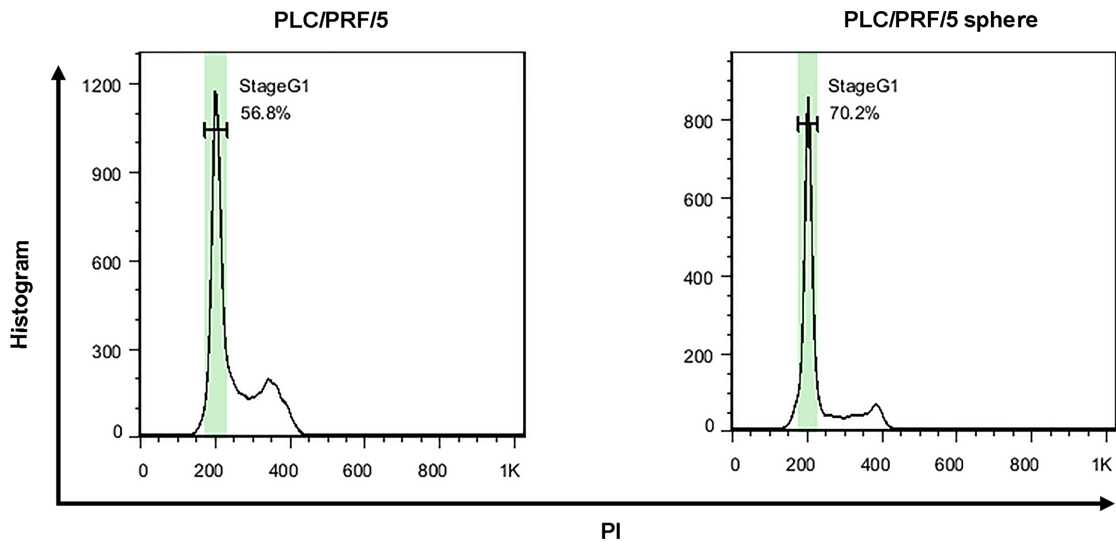

**Supplementary Figure S3: Cell cycle distribution of PLC/PRF/5 cells and PLC/PRF/5 sphere cells.** Numbers indicate the proportion of G0/G1 phase cells.

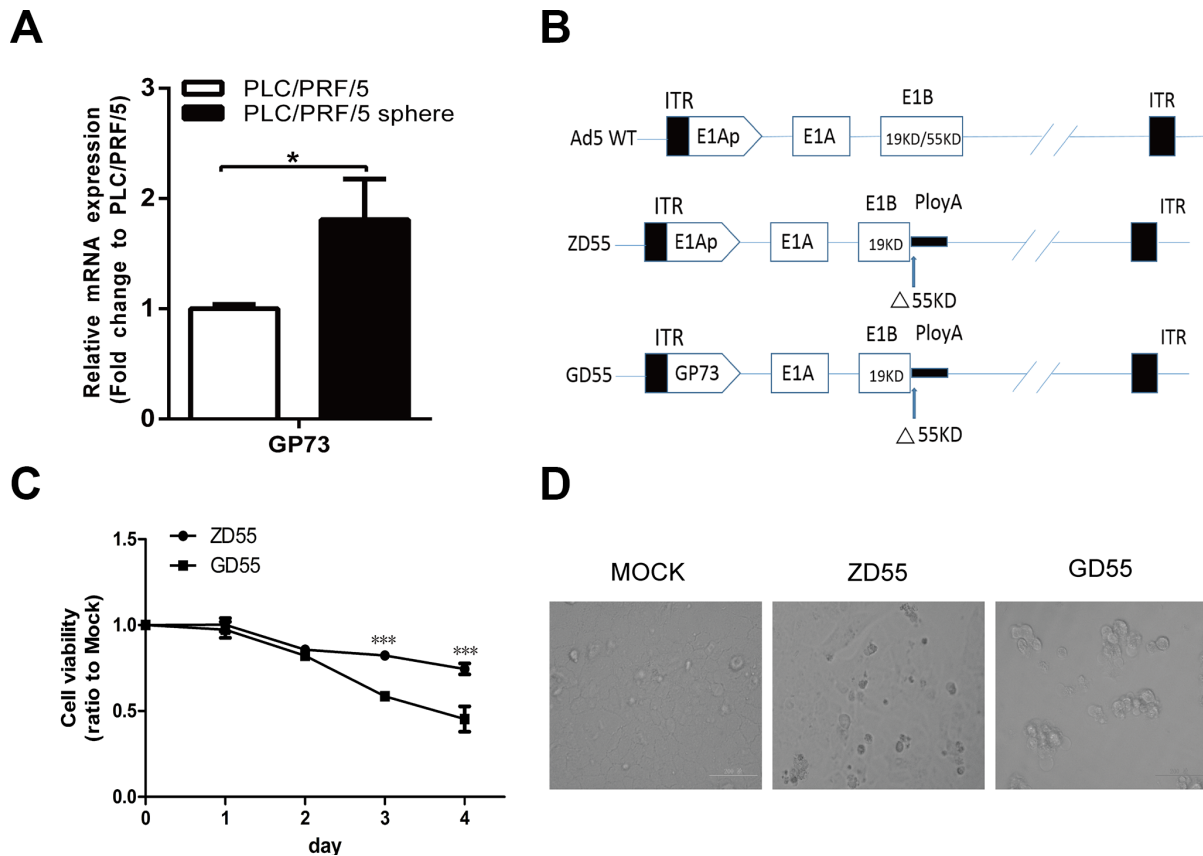

**Supplementary Figure S4: Construction of adenoviruses and cytotoxic effect of GD55 on PLC/PRF/5 sphere cells.**

(A) PLC/PRF/5 sphere cells acquired a little more expression level of GP73 when compared to PLC/PRF/5 cells. qRT-PCR data were normalized to GAPDH gene and shown as fold change relative to PLC/PRF/5 cells. (B) Schematic structure of recombinant oncolytic adenovirus was compared to the wild type adenovirus (Ad5WT). GD55 was designed with E1A promoter replaced by *GOLPH2* core promoter and E1B 55 kDa gene deletion. (C) Morphological observation of PLC/PRF/5 sphere cells after treated with ZD55 and GD55 (5MOI) for 72 h. scale bar: 200  $\mu$ m. (D) PLC/PRF/5 sphere cells were infected with GD55 or ZD55 at a MOI of 5. On the day 1, 2, 3, and 4 postinfection, cell viability was measured with MTT assay. All experiments were repeated three times and all data shown represented mean  $\pm$  SD ( $n = 3$ ). \* $P < 0.05$ , \*\* $P < 0.01$ , \*\*\* $P < 0.001$ .

**Supplementary Table S1: Sequences of Primers**

| Primers             | Sequences                                |
|---------------------|------------------------------------------|
| Nanog-forward       | 5'- CTCTCCTCTTCCTTCCTCCAT-3'             |
| Nanog-reverse       | 5'- TTGCGACACTCTTCTCTGC-3'               |
| Oct4-forward        | 5'- CTTGCTGCAGAAGTGGGTGGAGGAA -3'        |
| Oct4-reverse        | 5'- CTGCAGTGTGGGTTTCGGGCA-3'             |
| Sox2-forward        | 5'- AAATGGGAGGGGTGCAAAAGAGGAG -3'        |
| Sox2-reverse        | 5'- CAG CTG TCA TTT GCT GTG GGT GAT G-3' |
| CD44-forward        | 5'- CGGACACCATGGACAAGTTT-3'              |
| CD44-reverse        | 5'- GAAAGCCTTGCAGAGGTCAG-3'              |
| CD90-forward        | 5'- GACCCGTGAGACAAAGAAGC-3'              |
| CD90-reverse        | 5'- GCCCTCACACTTGACCAGTT-3'              |
| Albumin-forward     | 5'- CACAAAGATGACAACCCAAACCTCC-3'         |
| Albumin-reverse     | 5'- GGAGTTCCGGGGCATAAAAGTAAG-3'          |
| GAPDH-forward       | 5'-GATTTGGTCGTATTGGGCG-3'                |
| GAPDH-reverse       | 5'-TGGAAGATGGTGTATGGGAT-3'               |
| c-Myc-forward       | 5'- GCACTGGAAGTTACAACAC-3'               |
| c-Myc-reverse       | 5'- GGAGAGCCTTTCAGAGAAG-3'               |
| CD133-forward       | 5'-AAGCATTGGCATCTTCTATGG-3'              |
| CD133-reverse       | 5'-AAGCACAGAGGGTCATTGAGA-3'              |
| EpCAM-forward       | 5'-GCGGCTCAGAGAGACTGTG -3'               |
| EpCAM-reverse       | 5'-CCAAGCATTTAGACGCCAGTTT-3'             |
| CD24-forward        | 5'-TGAAGAACATGTGAGAGGTTTGAC-3'           |
| CD24-reverse        | 5'-GAAAACCTGAATCTCCATTCCACAA-3'          |
| ABCG2-forward       | 5'- GTTCTCAGCAGCTCTTCGGCTT -3'           |
| ABCG2-reverse       | 5'- TCCTCCAGACACACCACGGATA -3'           |
| MDR1-forward        | 5'- CATTGGTGTGGTGAGTCAG -3'              |
| MDR1-reverse        | 5'- GTCATAGGCATTGGCTTCC -3'              |
| MRP1-forward        | 5'-AAGACCAAGACGTATCAGGT-3'               |
| MRP1-reverse        | 5'-CAATGGTCACGTAGACGGCAA-3'              |
| Fibronectin-forward | 5'- CAGTGGGAGACCTCGAGAAG -3'             |
| Fibronectin-reverse | 5'- TCCCTCGGAACATCAGAAAC -3'             |

|                     |                                |
|---------------------|--------------------------------|
| N-Cadherin-forward  | 5'- ACAGTGGCCACCTACAAAGG-3'    |
| N-Cadherin -reverse | 5'- CCGAGATGGGGTTGATAATG-3'    |
|                     |                                |
| G6P-forward         | 5'-GTCTGTCACGAATCTACCTTG-3'    |
| G6P-reverse         | 5'-CTACACCCAGTCCCTTGAG-3'      |
|                     |                                |
| Twist-forward       | 5'-AAGGCATCACTATGGACTTTCTCT-3' |
| Twist-reverse       | 5'-GCCAGTTTGATCCCAGTATTTT-3'   |
|                     |                                |
| Slug-forward        | 5'-GCATTTCTTCACTCCGAAGC-3'     |
| Slug-reverse        | 5'-TGAATTCCATGCTCTTGCAG-3'     |
|                     |                                |
| GP73-forward        | 5'-GTGTGAGGAGCGAATAGAAGAGG-3'  |
| GP73-reverse        | 5'-GTCTCTGGTCGTTGTTTTCACT-3'   |
